# Supplementary material for: Programmable nanocomposites of cellulose nanocrystals and zwitterionic hydrogels for soft robotics
Source: PubMed Central journal article supplement (PMC10542366; doi:10.1038/s41467-023-41874-7), 2023-09-30
Supplement: 41467_2023_41874_MOESM3_ESM.pdf [file 41467_2023_41874_MOESM3_ESM.pdf]

## Description of Additional Supplementary Files

**Supplementary Movie 1.** The video shows considerable in-plane differential swelling of the AGel sample in water.

**Supplementary Movie 2.** The video shows elongations of a rectangle (5 mm × 25 mm) made of one piece of Gel (lower half) and one piece of AGel cut in the perpendicular direction (upper half) after 6 h of healing.

**Supplementary Movie 3.** The video shows the reversible bending of an AGel strip in which the alignment of CNCs is perpendicular to the long axis.

**Supplementary Movie 4.** The video shows the reversible bending of an AGel strip in which the alignment of CNCs is parallel to the long axis.

**Supplementary Movie 5.** The video shows an AGel strip in which the angle between the CNC alignment and the long axis of the strip is 45° forming a helix reversibly.

**Supplementary Movie 6.** The video shows complex reversible 3D shape morphing of the hydrogel construct triggered by increasing and decreasing the pH.

**Supplementary Movie 7.** The video shows complex reversible 3D shape morphing of the hydrogel construct triggered by increasing and decreasing the pH.

**Supplementary Movie 8.** The video shows complex reversible 3D shape morphing of the hydrogel construct triggered by increasing and decreasing the pH.

**Supplementary Movie 9.** The video shows the fast dissolution of GelWC piece in 10 wt% NaCl solution.

**Supplementary Movie 10.** The video shows the pH-responsive miniature gripper made by applying the cut-and-paste approach. The gripper was used to transfer light spherical cargo.

**Supplementary Movie 11.** The video shows the pH-responsive miniature gripper made by applying the cut-and-paste approach. The gripper was used to transfer soft biological cargo.

**Supplementary Movie 12.** The video shows a miniature robot that can be remotely navigated to transfer very light cargo through a confined flooded maze.

**Supplementary Movie 13.** The video shows the shape change of AGel pieces cut with the CNC alignment perpendicular to the long axis and making a 45° angle with the long axis in response to pH change at temperatures close to the physiological temperature.
